# Supplementary material
Source: PubMed Central journal article supplement (PMC4535332)

SUPPLEMENTARY DATA

Supplementary Figure 1. Schema of the study design

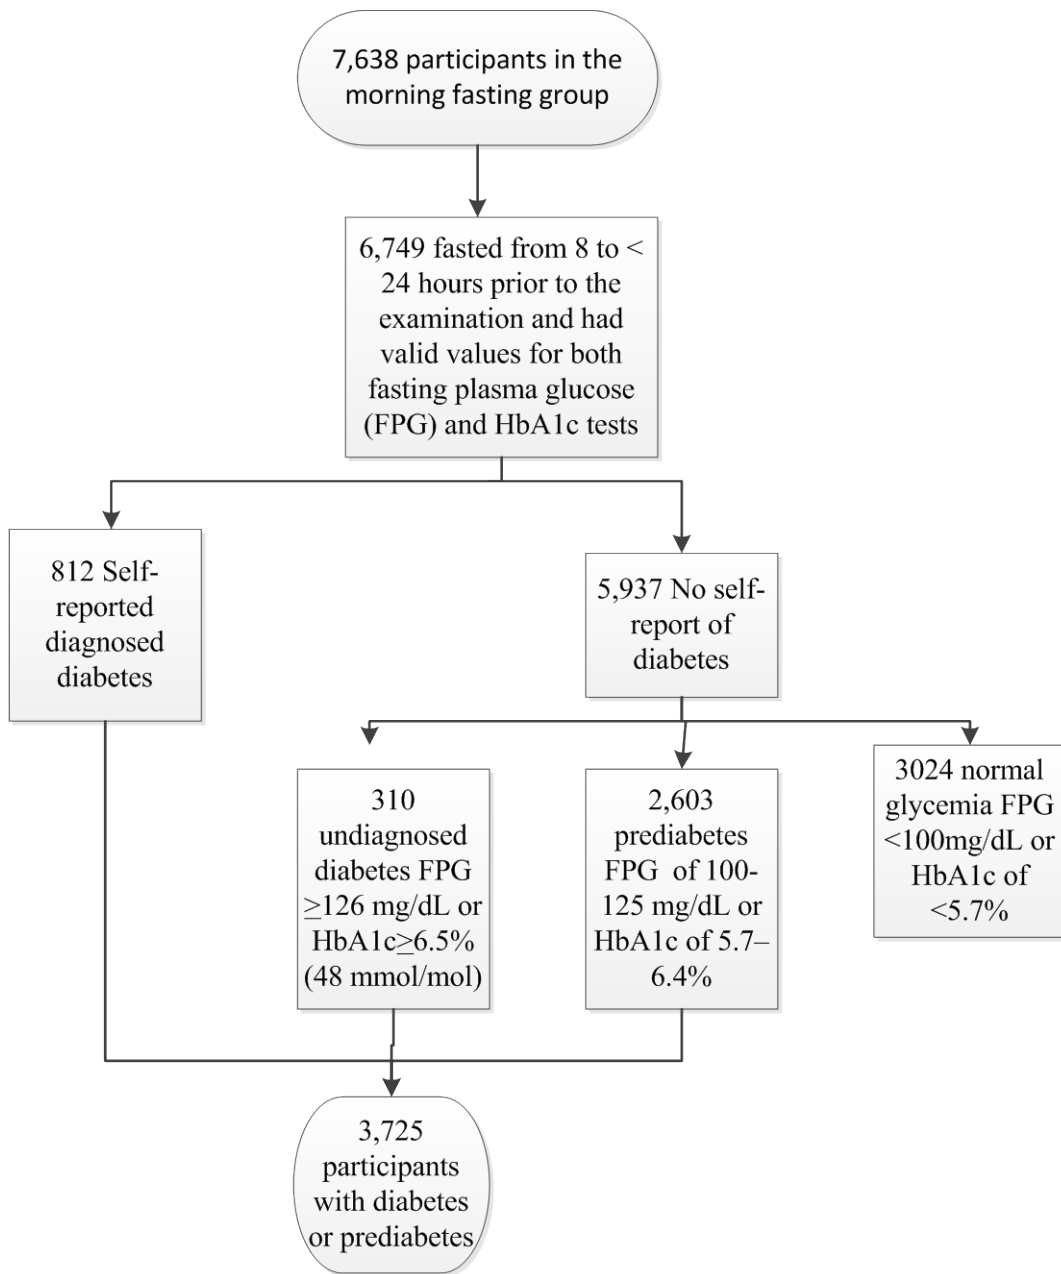

Supplement: NIHMS696403-supplement-figure.pdf [file NIHMS696403-supplement-figure.pdf]
